# Supplementary material
Source: publisher figshare collection journal article supplement (https://tandf.figshare.com/ndownloader/files/33157459)
Supplement: Supplementary file 1 [file 33157459]

Table 2b. Standardised factorial loads of D-EAS items’ (N=157)

| Items | Standardised factorial load | Kaiser-Meyer-Olkin |
| --- | --- | --- |
|  |  |  |
| 1. Do you have to put in a lot of effort to hear what is being said in conversation with others? | 0.90 | 0.83 |
|  |  |  |
| 1. How much do you have to concentrate when listening to someone? | 0.93 | 0.82 |
|  |  |  |
| 1. How easily can you ignore other sounds when trying to listen to something? | 0.76 | 0.95 |
|  |  |  |
| 1. Do you have to put in a lot of effort to follow discussion in a class, a meeting or a lecture? | 0.92 | 0.89 |
|  |  |  |
| 1. Do you have to put in a lot of effort to follow the conversation in a noisy environment (e.g., in a restaurant, at family gatherings)? | 0.86 | 0.89 |
|  |  |  |
| 1. Do you have to put in a lot of effort to listen on the telephone? | 0.75 | 0.95 |
|  | | |
